# Supplementary material
Source: HighWire-hosted journal article supplement (http://www.qdcxjkg.com/highwire/filestream/128292/field_highwire_adjunct_files/0/ERJ-01899-2015_Online_supplement.pdf)

## ONLINE SUPPLEMENTARY MATERIAL

### Title

### Clinical phenotypes in adult patients with bronchiectasis

#### MATERIALS AND METHODS

##### Process to define bronchiectasis etiology

Patients in every site underwent the same comprehensive diagnostic work-up as suggested by the 2010 British Thoracic Society (BTS) guidelines including: complete blood count, serum electrophoresis, serum immunoglobulin (Ig) G, IgA, IgM, total IgE, specific IgE and precipitins for *A. fumigatus*, and pulmonary function test with reversibility testing and diffusion capacity test [1].

In case of clinical suspicion of ciliary dyskinesia, such as recurrent sinusitis and/or chronic otitis media, nasal mucociliary clearance was measured by the saccharin test and nasal nitric oxide or referral to a specialist primary ciliary dyskinesia centre. Alpha<sub>1</sub>-antitrypsin was evaluated in the presence of emphysema affecting lower lobes on high-resolution computed tomography (HRCT) scan and/or significant family history. Autoimmunity testing including anti-nucleolar antibodies, extractable nuclear antigens, anti-neutrophil cytoplasmic antibodies, rheumatoid factor and anti-citrullinated protein antibody, were requested if a rheumatological disease was clinically suspected. Sweat test and cystic fibrosis (CF) transmembrane conductance regulator genetic testing were requested if signs and symptoms suggestive for CF as suggested by BTS guidelines [1].

An evaluation of CT images and testing results was performed, including immunoglobulins, skin prick testing or serum IgE testing to *A. fumigatus* and *Aspergillus* precipitins, and serum electrophoresis, in order to differentiate patients into categories of congenital abnormalities of the bronchial tree, post-obstructive bronchiectasis, primary or secondary immunodeficiency, alpha<sub>1</sub>-antitrypsin deficiency or allergic bronchopulmonary aspergillosis (ABPA). If all of the above tests

were negative, a history of prior severe respiratory infections was investigated, including previous infection with non-tuberculous mycobacteria. If no history of previous respiratory infections was present, an association between bronchiectasis and other diseases, such as COPD, asthma, inflammatory bowel disease (IBD), gastro-oesophageal reflux disease (GORD) or connective tissue disease (CTD) was investigated. If tests were negative and no association with other diseases was found, a diagnosis of idiopathic bronchiectasis was made.

ABPA was diagnosed in the presence of a serum IgE >1000 IU/ml and *Aspergillus fumigatus* precipitins >10 IU/ml or raised specific IgE to *Aspergillus plus* sputum and/or peripheral blood eosinophilia (>500/mm<sup>3</sup>) and central bronchiectasis [2]. A diagnosis of post-infective bronchiectasis was made if the patient reported a history of symptoms due to bronchiectasis with an onset immediately after a severe respiratory infection, such as pneumonia or tuberculosis. Where a patient reported a history of severe respiratory infections, but with at least a five-years period free from respiratory symptoms since that infection, the post-infective diagnosis was not attributed. Bronchiectasis-COPD overlap syndrome was classified in the presence of significant smoking history and airflow obstruction according to GOLD [3]. Bronchiectasis associated with asthma was diagnosed in patients without post-infective bronchiectasis and with normal or negative results of blood investigations according to GINA guidelines [4]. Bronchiectasis associated with IBD was diagnosed if patients had ulcerative colitis or Crohn's disease and no other suggested etiology for bronchiectasis. In the presence of a diagnosis of both bronchiectasis and CTD, including rheumatoid arthritis, Sjögren syndrome and systemic sclerosis, a diagnosis of CTD-associated bronchiectasis was made. Yellow nail syndrome was diagnosed when examination showed yellow discoloration of dystrophic nails together with bronchiectasis and sinusitis, whether or not patients had other features of the syndrome.

## Study outcome

*Exacerbations.* An exacerbation of bronchiectasis was defined as a clinical diagnosis of exacerbation for which antibiotics were prescribed in the presence of at least one (and usually more than one) of the following symptoms: increasing cough, increasing sputum volume, worsening sputum purulence, worsening dyspnea, increased fatigue/malaise, fever, and haemoptysis [1]. Exacerbations were either documented by the treating physicians or self-reported by the patient during visits in the clinic or during hospitalization. Hospitalizations because of an exacerbation of bronchiectasis have been also double-checked on local electronic system.

## Principal Component and cluster analysis

Among the variables reported in Table 1, Spearman correlation selected the following variables: age, Reiff score, daily cough, daily sputum, medical research council (MRC) breathlessness scale, long-term oxygen therapy (LTOT), number of exacerbations in the previous year, the presence of at least one hospitalization in the previous year, FEV<sub>1</sub>, chronic infection, chronic infection with *P. aeruginosa*, chronic infection with other pathogens, more than one pathogen causing chronic infection, and Charlson comorbidity index >1, see Table S3. The PCA identified 14 components and 7 were selected because of an eigenvalue >0.70, see Table S4.

The most important variables, i.e. those with a factor loading >0.4, were selected for the cluster analysis as detailed in Table S5. These included: age, Reiff score, daily cough, daily sputum, MRC breathlessness scale, LTOT, exacerbations and hospitalization in the previous year, FEV<sub>1</sub>, chronic infection with *P. aeruginosa* or other pathogens, and Charlson comorbidity index. Finally, four clusters were detected within the enrolled cohort (Gower dissimilarity value= 20), as depicted in Figure S1. Correlations among variables were assessed in every cluster (see Table S6).

## Validation cohort

In order to validate the primary cluster analysis, we recruited an independent population of patients with HRCT confirmed bronchiectasis at Ninewells Hospital, Dundee, UK during 2014. We hypothesized that the clinical clusters identified in the primary study would show differences in neutrophil mediated inflammation. The validation study was conducted as a case control study, with a consecutive cohort of 30 patients recruited in each of the 4 identified phenotype arms (identified by their primary clustering characteristic). The objective of the validation study was to demonstrate differences in inflammatory markers between the groups to validate in biological terms, the differences between the groups. As the study needed to be powered on an individual marker we chose myeloperoxidase as a well-recognised marker of neutrophilic inflammation. Previously published literature showed a difference between patients colonised with *Pseudomonas* vs. those without (13.5 U/ml [4–38.6] vs. 2.6 [0.6–50.8]),  $p < 0.0001$  [5]. We therefore used a difference of 10 units with a common standard deviation of 12. This gave the validation study 90% power (with alpha of 5%) with a sample size of 30. Spontaneous sputum samples were obtained and ultracentrifuged at 50,000G for 90mins to obtain supernatant for inflammatory marker measurement as previously described [10]. Clinical evaluation was conducted as described above.

## RESULTS

Differences in outcomes between each clusters

| Outcomes                                             | Cluster 1 VS. Cluster 2 | Cluster 1 VS. Cluster 3 | Cluster 1 VS. Cluster 4 | Cluster 2 VS. Cluster 3 | Cluster 2 VS. Cluster 4 | Cluster 3 VS. Cluster 4 |
|------------------------------------------------------|-------------------------|-------------------------|-------------------------|-------------------------|-------------------------|-------------------------|
| <i>Exacerbations during one-year follow-up</i>       | <0.0001                 | <0.0001                 | <0.0001                 | 0.001                   | <0.0001                 | 0.002                   |
| <i>≥ 1 hospitalization during one-year follow-up</i> | <0.0001                 | <0.0001                 | <0.0001                 | 1.00                    | 0.50                    | 0.47                    |
| <i>Mortality during one-year follow-up</i>           | 0.03                    | 0.40                    | 0.92                    | 0.10                    | 0.02                    | 0.40                    |
| <i>Mortality during three-year follow-up</i>         | 0.002                   | 0.002                   | 0.06                    | 0.78                    | 0.16                    | 0.21                    |

## REFERENCES

1. Pasteur MC, Bilton D, Hill AT; British Thoracic Society Bronchiectasis non-CF Guideline Group. British Thoracic Society guideline for non-CF bronchiectasis. *Thorax*. 2010 Jul;65 Suppl 1:i1-58
2. Shoemark L, Ozerovitch L, Wilson R. Etiology in adult patients with bronchiectasis. *Respir Med* 2007;101:1163-1170.
3. Global Initiative for Chronic Obstructive Lung Disease. Global Strategy for the Diagnosis, Management and Prevention of COPD. [http://www.goldcopd.org/uploads/users/files/GOLD\\_Report\\_2014\\_Jun11.pdf](http://www.goldcopd.org/uploads/users/files/GOLD_Report_2014_Jun11.pdf).
4. Global Initiative for Asthma. Global Management and Prevention 2012. [www.ginasthma.org](http://www.ginasthma.org).
5. Chalmers JD, Smith MP, McHugh BJ, Doherty C, Govan JR, Hill AT. Short- and long-term antibiotic treatment reduces airway and systemic inflammation in non-cystic fibrosis bronchiectasis. *Am J Respir Crit Care Med* 2012;186:657-665.

## ONLINE TABLES

**Table S1. Patients' characteristics of the five study cohorts**

| <b>Variables</b>                      |              | <b>Dundee,<br/>UK</b> | <b>Leuven,<br/>Belgium</b> | <b>Monza,<br/>Italy</b> | <b>Galway,<br/>Ireland</b> | <b>Athens,<br/>Greece</b> |
|---------------------------------------|--------------|-----------------------|----------------------------|-------------------------|----------------------------|---------------------------|
| Total                                 | n.(%)        | 286 (100)             | 190 (100)                  | 230 (100)               | 280 (100)                  | 159 (100)                 |
| <b>Demographics and comorbidities</b> |              |                       |                            |                         |                            |                           |
| Age, years                            | median (IQR) | 67 (59-73)            | 69 (58-79)                 | 70 (60-74)              | 63 (55-71)                 | 60 (50-73)                |
| Male                                  | n.(%)        | 119 (42)              | 93 (49)                    | 93 (40)                 | 92 (33)                    | 58 (37)                   |
| Body Mass Index                       | median (IQR) | 25.4 (21.8-<br>28.6)  | 23.4 (21.0-<br>26.6)       | 23.7 (20.6-<br>26.4)    | 26.4<br>(23.2-<br>30.3)    | 24.6 (22.7-<br>26.9)      |
| Smokers / Ex-smokers                  | n.(%)        | 55 (19)               | 93 (49)                    | 109 (47)                | 122 (44)                   | 58 (37)                   |
| Charlson Comorbidity Index>1          | n.(%)        | 118 (41)              | 82 (43)                    | 81 (35)                 | 82 (29)                    | 10 (6.3)                  |
| <b>Severity of the disease</b>        |              |                       |                            |                         |                            |                           |
| BSI score                             | median (IQR) | 6 (4-11)              | 7 (4-11)                   | 6 (4-9)                 | 5 (4-9)                    | 9 (5-13)                  |
| <b>Radiological Status</b>            |              |                       |                            |                         |                            |                           |
| Reiff score                           | median (IQR) | 4 (2-6)               | 3 (2-6)                    | 5 (4-6)                 | 2 (2-4)                    | 4 (3-6)                   |
| <b>Clinical status</b>                |              |                       |                            |                         |                            |                           |
| Daily cough                           | n.(%)        | 286 (100)             | 151 (80)                   | 124 (54)                | 192 (69)                   | 146 (92)                  |
| Daily sputum                          | n.(%)        | 237 (83)              | 86 (45)                    | 113 (49)                | 164 (59)                   | 144 (91)                  |
| Prior history of haemoptysis          | n.(%)        | 19 (6.6)              | 28 (15)                    | 57 (25)                 | 39 (14)                    | 63 (40)                   |
| MRC breathlessness scale              | median (IQR) | 3 (1-4)               | 2 (1-3)                    | 1 (1-3)                 | 2 (1-3)                    | 5 (5-5)                   |
| Long-term oxygen therapy              | n.(%)        | 8 (2.8)               | 10 (5.3)                   | 33 (14)                 | 9 (3.2)                    | 26 (16)                   |
| Exacerbations in the previous year    | median (IQR) | 2 (1-3)               | 1 (0-3)                    | 1 (0-3)                 | 3 (2-4)                    | 2 (1-3)                   |
| At least one hospitalization          | n.(%)        | 66 (23)               | 54 (28)                    | 42 (18)                 | 62 (22)                    | 83 (53)                   |

|                                             |              |               |               |               |               |                  |
|---------------------------------------------|--------------|---------------|---------------|---------------|---------------|------------------|
| in the previous year                        |              |               |               |               |               |                  |
| <b>Functional Status</b>                    |              |               |               |               |               |                  |
| FEV <sub>1</sub> , % predicted              | median (IQR) | 72 (50-92)    | 70 (50-88)    | 82 (57-101)   | 79 (63-98)    | 74 (55-88)       |
| <b>Microbiology</b>                         |              |               |               |               |               |                  |
| Chronic infection with <i>P. aeruginosa</i> | n.(%)        | 44 (15)       | 16 (8.4)      | 23 (10)       | 39 (14)       | 58 (36)          |
| Chronic infection with other pathogens      | n.(%)        | 128 (45)      | 19 (10)       | 24 (10)       | 78 (28)       | 26 (16)          |
| <b>Laboratory findings</b>                  |              |               |               |               |               |                  |
| C-reactive protein, mg/L                    | median (IQR) | 6.0 (4.0-8.0) | 3.1 (1.0-8.0) | 3.5 (1.5-9.7) | 3.9 (1.5-7.0) | 22.0 (12.0-46.0) |
| <b>Long-term antibiotic treatment</b>       |              |               |               |               |               |                  |
| Long-term macrolide                         | n.(%)        | 98 (34)       | 81 (43)       | 12 (5.2)      | 126 (45)      | 41 (26)          |
| Long-term inhaled antibiotic treatment      | n.(%)        | 16 (5.6)      | 0 (0.0)       | 2 (0.9)       | 24 (8.6)      | 48 (30)          |

n: number; IQR: interquartile range 25-75; BSI: Bronchiectasis Severity Index; MRC: medical research council; LTOT: long-term oxygen therapy. SGRQ: St. George's Respiratory Questionnaire; FEV<sub>1</sub>: forced expiratory volume in the first second; NA: not available

**Table S2. Distribution of the four clusters among the five study centers.**

| <b>Cluster</b>                   |       | <b>Dundee,<br/>UK</b> | <b>Leuven,<br/>Belgium</b> | <b>Monza,<br/>Italy</b> | <b>Galway,<br/>Ireland</b> | <b>Athens,<br/>Greece</b> | <b>p</b> |
|----------------------------------|-------|-----------------------|----------------------------|-------------------------|----------------------------|---------------------------|----------|
| Total                            | n.(%) | 286 (100)             | 190 (100)                  | 230 (100)               | 280<br>(100)               | 146 (100)                 |          |
| <b>“Pseudomonas”</b>             |       | 44 (15)               | 16 (8)                     | 23 (10)                 | 39 (14)                    | 57 (39)                   | <0.001   |
| <b>“Other chronic infection”</b> |       | 128 (45)              | 19 (10)                    | 24 (10)                 | 78 (28)                    | 24 (16)                   | <0.001   |
| <b>“Daily sputum”</b>            |       | 90 (32)               | 66 (35)                    | 87 (38)                 | 74 (26)                    | 56 (38)                   | 0.035    |
| <b>“Dry bronchiectasis”</b>      |       | 24 (8)                | 89 (47)                    | 96 (42)                 | 89 (32)                    | 9 (7)                     | <0.001   |



**Table S3. Spearman correlation between the demographic, epidemiological, and clinical variables.**

|                                                   | Age     | Sex     | BMI     | Smokers/ ex smokers | Reiff_score | Daily cough | Daily sputum | Prior history of haemoptysis | MRC     | LTOT    | Exacerbations in the previous year | At least one hospitalization in the previous year | FEV <sub>1</sub> | Chronic infection | Chronic infection with <i>P. aeruginosa</i> | Chronic infection with other pathogens | More than one pathogen causing chronic infection | Charlson Comorbidity Index>1 | C-reactive protein |
|---------------------------------------------------|---------|---------|---------|---------------------|-------------|-------------|--------------|------------------------------|---------|---------|------------------------------------|---------------------------------------------------|------------------|-------------------|---------------------------------------------|----------------------------------------|--------------------------------------------------|------------------------------|--------------------|
| Age                                               | 1       |         |         |                     |             |             |              |                              |         |         |                                    |                                                   |                  |                   |                                             |                                        |                                                  |                              |                    |
| Sex                                               | 0.1019  | 1       |         |                     |             |             |              |                              |         |         |                                    |                                                   |                  |                   |                                             |                                        |                                                  |                              |                    |
| Body mass index                                   | 0.0087  | 0.1182  | 1       |                     |             |             |              |                              |         |         |                                    |                                                   |                  |                   |                                             |                                        |                                                  |                              |                    |
| Smokers/ ex smokers                               | 0.1428  | 0.2064  | 0.0009  | 1                   |             |             |              |                              |         |         |                                    |                                                   |                  |                   |                                             |                                        |                                                  |                              |                    |
| Reiff_score                                       | 0.1789  | 0.0787  | -0.1806 | -0.0011             | 1           |             |              |                              |         |         |                                    |                                                   |                  |                   |                                             |                                        |                                                  |                              |                    |
| Daily cough                                       | 0.0064  | 0.0420  | 0.0037  | -0.0666             | 0.0545      | 1           |              |                              |         |         |                                    |                                                   |                  |                   |                                             |                                        |                                                  |                              |                    |
| Daily sputum                                      | 0.0671  | 0.0655  | 0.0555  | -0.0460             | 0.1230      | 0.3820      | 1            |                              |         |         |                                    |                                                   |                  |                   |                                             |                                        |                                                  |                              |                    |
| Prior history of haemoptysis                      | 0.0443  | -0.0042 | -0.0228 | 0.0005              | 0.0876      | -0.0157     | 0.0995       | 1                            |         |         |                                    |                                                   |                  |                   |                                             |                                        |                                                  |                              |                    |
| MRC                                               | 0.1882  | 0.1001  | 0.0066  | 0.0851              | 0.2947      | 0.1651      | 0.2147       | 0.0332                       | 1       |         |                                    |                                                   |                  |                   |                                             |                                        |                                                  |                              |                    |
| LTOT                                              | 0.0523  | 0.1127  | -0.0416 | 0.1354              | 0.1958      | 0.0301      | 0.0991       | 0.0113                       | 0.4399  | 1       |                                    |                                                   |                  |                   |                                             |                                        |                                                  |                              |                    |
| Exacerbations in the previous year                | -0.1057 | -0.0378 | 0.1189  | 0.0390              | 0.0240      | 0.0779      | 0.1801       | 0.0297                       | 0.2183  | 0.1777  | 1                                  |                                                   |                  |                   |                                             |                                        |                                                  |                              |                    |
| At least one hospitalization in the previous year | 0.0400  | 0.0557  | -0.0294 | 0.0318              | 0.1779      | 0.1334      | 0.2090       | 0.0762                       | 0.3465  | 0.2218  | 0.4420                             | 1                                                 |                  |                   |                                             |                                        |                                                  |                              |                    |
| FEV <sub>1</sub>                                  | -0.1424 | -0.1796 | 0.0299  | -0.1115             | -0.3086     | -0.1337     | -0.1632      | -0.0737                      | -0.5271 | -0.2940 | -0.1680                            | -0.2409                                           | 1                |                   |                                             |                                        |                                                  |                              |                    |
| Chronic infection                                 | -0.0168 | 0.0571  | -0.0236 | -0.0971             | 0.1892      | 0.2463      | 0.2916       | -0.0098                      | 0.2220  | 0.1084  | 0.1498                             | 0.2051                                            | -0.1903          | 1                 |                                             |                                        |                                                  |                              |                    |
| Chronic infection with <i>P. aeruginosa</i>       | 0.0274  | 0.0595  | -0.0293 | -0.0758             | 0.2245      | 0.1517      | 0.2292       | 0.0565                       | 0.2550  | 0.2227  | 0.2123                             | 0.3554                                            | -0.1828          | 0.4970            | 1                                           |                                        |                                                  |                              |                    |
| Chronic infection with other pathogens            | -0.0407 | 0.0163  | -0.0030 | -0.0480             | 0.0323      | 0.1543      | 0.1431       | -0.0561                      | 0.0445  | -0.0566 | -0.0020                            | -0.0544                                           | -0.0668          | 0.7211            | -0.2428                                     | 1                                      |                                                  |                              |                    |
| More than one pathogen causing chronic infection  | -0.0356 | 0.0927  | 0.0378  | -0.0289             | 0.1047      | 0.1202      | 0.2292       | 0.0194                       | 0.1585  | 0.0228  | 0.1400                             | 0.1806                                            | -0.1401          | 0.4970            | 0.2496                                      | 0.3563                                 | 1                                                |                              |                    |
| Charlson Comorbidities Index>1                    | 0.2547  | 0.1592  | 0.0159  | 0.1702              | 0.0376      | 0.0240      | 0.0331       | 0.0169                       | 0.2326  | 0.0883  | -0.0070                            | 0.0730                                            | -0.1325          | 0.0229            | -0.0194                                     | 0.0411                                 | 0.0144                                           | 1                            |                    |
| C-reactive protein                                | 0.0720  | 0.0541  | 0.0339  | -0.0045             | 0.1870      | 0.1926      | 0.1739       | 0.0566                       | 0.2224  | 0.1559  | 0.0883                             | 0.1730                                            | -0.2522          | 0.2272            | 0.1927                                      | 0.1001                                 | 0.1597                                           | 0.1024                       | 1                  |

MRC: medical research council; LTOT: long-term oxygen therapy; FEV<sub>1</sub>: forced expiratory volume in the first second.

**Table S4. Principal components detected in the recruited cohort of patients.**

| <b>Component</b>    | <b>Eigenvalue</b> | <b>Difference</b> | <b>Proportion</b> | <b>Cumulative</b> |
|---------------------|-------------------|-------------------|-------------------|-------------------|
| <b>Component 1</b>  | 3.36719           | 1.41608           | 0.2405            | 0.2405            |
| <b>Component 2</b>  | 1.95111           | .531262           | 0.1394            | 0.3799            |
| <b>Component 3</b>  | 1.41985           | .286922           | 0.1014            | 0.4813            |
| <b>Component 4</b>  | 1.13293           | .0800947          | 0.0809            | 0.5622            |
| <b>Component 5</b>  | 1.05283           | .0948883          | 0.0752            | 0.6374            |
| <b>Component 6</b>  | .957942           | .176139           | 0.0684            | 0.7058            |
| <b>Component 7</b>  | .781803           | .0844368          | 0.0558            | 0.7617            |
| <b>Component 8</b>  | .697366           | .0370576          | 0.0498            | 0.8115            |
| <b>Component 9</b>  | .660309           | .0644335          | 0.0472            | 0.8587            |
| <b>Component 10</b> | .595875           | .0384295          | 0.0426            | 0.9012            |
| <b>Component 11</b> | .557446           | .0675654          | 0.0398            | 0.9410            |
| <b>Component 12</b> | .48988            | .154401           | 0.0350            | 0.9760            |
| <b>Component 13</b> | .335479           | .335479           | 0.0240            | 1                 |
| <b>Component 14</b> | 0                 | .                 | 0.0000            | 1                 |

**Table S5. Factor loadings of the variables in relation with the principal components.**

| Variable                                          | Comp1   | Comp2   | Comp3   | Comp4   | Comp5   | Comp6   | Comp7   | Comp8   | Comp9   | Comp10  | Comp11  | Comp12  | Comp13  |
|---------------------------------------------------|---------|---------|---------|---------|---------|---------|---------|---------|---------|---------|---------|---------|---------|
| Age                                               | 0.0801  | -0.2111 | 0.4834  | 0.2918  | 0.2115  | 0.2494  | -0.0935 | 0.6772  | 0.0825  | -0.1367 | 0.0684  | 0.1401  | -0.0784 |
| Reiff score                                       | 0.2500  | -0.1581 | 0.1055  | -0.1205 | 0.4029  | -0.2149 | -0.6720 | -0.2396 | 0.1847  | 0.3265  | 0.0658  | 0.1541  | -0.0246 |
| Daily cough                                       | 0.2088  | 0.1764  | -0.0576 | 0.6118  | -0.0871 | -0.3391 | 0.0033  | -0.2208 | 0.1089  | -0.3550 | 0.4340  | 0.2098  | -0.0774 |
| Daily sputum                                      | 0.2733  | 0.1565  | -0.0897 | 0.5392  | -0.0374 | -0.1474 | 0.0438  | 0.1449  | -0.1949 | 0.5449  | -0.4055 | -0.2378 | 0.0073  |
| MRC breathlessness scale                          | 0.3864  | -0.2830 | 0.1608  | -0.1004 | -0.1583 | -0.1401 | 0.1639  | 0.0059  | -0.0752 | -0.0030 | 0.1043  | 0.0168  | 0.8039  |
| Long-term oxygen therapy                          | 0.2714  | -0.3172 | 0.0291  | -0.2297 | -0.1688 | -0.2904 | 0.4727  | 0.1015  | 0.2790  | 0.3126  | 0.1407  | 0.1608  | -0.4519 |
| Exacerbations in the previous year                | 0.2328  | -0.0340 | -0.4349 | -0.0065 | -0.4253 | 0.3100  | -0.2656 | 0.1479  | 0.0772  | -0.0313 | -0.2314 | 0.5705  | 0.0109  |
| At least one hospitalization in the previous year | 0.3257  | -0.1484 | -0.2901 | -0.0047 | -0.1584 | 0.3429  | -0.1996 | 0.0785  | 0.1552  | -0.0286 | 0.3809  | -0.6466 | -0.1042 |
| FEV <sub>1</sub>                                  | -0.3195 | 0.2255  | -0.1544 | 0.1450  | 0.1396  | 0.2486  | 0.1748  | 0.0497  | 0.5152  | 0.4488  | 0.3111  | 0.1402  | 0.3234  |
| Chronic infection                                 | 0.3604  | 0.4401  | 0.0971  | -0.1770 | 0.1494  | 0.0492  | 0.1095  | 0.0131  | 0.2930  | -0.1762 | -0.2072 | -0.0501 | 0.0105  |
| Chronic infection with <i>P. aeruginosa</i>       | 0.3164  | -0.0473 | -0.2839 | 0.0188  | 0.5833  | 0.1842  | 0.3135  | -0.1079 | 0.1024  | -0.2305 | -0.2260 | 0.0421  | 0.0113  |
| Chronic infection with other pathogens            | 0.1543  | 0.5302  | 0.3325  | -0.2131 | -0.2923 | -0.0901 | -0.1245 | 0.0997  | 0.2474  | -0.0157 | -0.0540 | -0.0893 | 0.0028  |
| More than one colonization                        | 0.2537  | 0.3500  | 0.0259  | -0.1830 | 0.1479  | 0.2418  | 0.0945  | 0.0351  | -0.6081 | 0.2346  | 0.4502  | 0.2283  | -0.0942 |
| Charlson Comorbidities Index>1                    | 0.0957  | -0.1430 | 0.4677  | 0.2019  | -0.1874 | 0.5220  | 0.1089  | -0.5919 | 0.0549  | 0.1062  | -0.1114 | 0.0474  | -0.1095 |

MRC: medical research council; LTOT: long-term oxygen therapy; FEV<sub>1</sub>: forced expiratory volume in the first second.

**Table S6. Correlations among variables as assessed in every cluster.**

| Cluster 1 "Pseudomonas"                           |         |         |         |         |                           |                 |                |                 |                                    |                |                |                                              |                                                                |                  |                      |                                                       |                                                 |                                                                 |                                       |                       |   |
|---------------------------------------------------|---------|---------|---------|---------|---------------------------|-----------------|----------------|-----------------|------------------------------------|----------------|----------------|----------------------------------------------|----------------------------------------------------------------|------------------|----------------------|-------------------------------------------------------|-------------------------------------------------|-----------------------------------------------------------------|---------------------------------------|-----------------------|---|
|                                                   |         | Age     | Sex     | BMI     | Smokers/<br>ex<br>smokers | Reiff_<br>score | Daily<br>cough | Daily<br>sputum | Prior history<br>of<br>haemoptysis | MRC            | LTOT           | Exacerbat<br>ions in the<br>previous<br>year | At least one<br>hospitalizat<br>ion in the<br>previous<br>year | FEV <sub>1</sub> | Chronic<br>infection | Chronic<br>infection<br>with <i>P.<br/>aeruginosa</i> | Chronic<br>infection<br>with other<br>pathogens | More_than<br>one<br>pathogen<br>causing<br>chronic<br>infection | Charlson<br>Comorbidi<br>ties Index>1 | C-reactive<br>protein |   |
| Age                                               | p       | 1       |         |         |                           |                 |                |                 |                                    |                |                |                                              |                                                                |                  |                      |                                                       |                                                 |                                                                 |                                       |                       |   |
|                                                   | p-value |         |         |         |                           |                 |                |                 |                                    |                |                |                                              |                                                                |                  |                      |                                                       |                                                 |                                                                 |                                       |                       |   |
| Sex                                               | p       | 0.0173  | 1       |         |                           |                 |                |                 |                                    |                |                |                                              |                                                                |                  |                      |                                                       |                                                 |                                                                 |                                       |                       |   |
|                                                   | p-value | 0.8477  |         |         |                           |                 |                |                 |                                    |                |                |                                              |                                                                |                  |                      |                                                       |                                                 |                                                                 |                                       |                       |   |
| BMI                                               | p       | -0.0517 | 0.1566  | 1       |                           |                 |                |                 |                                    |                |                |                                              |                                                                |                  |                      |                                                       |                                                 |                                                                 |                                       |                       |   |
|                                                   | p-value | 0.5655  | 0.0800  |         |                           |                 |                |                 |                                    |                |                |                                              |                                                                |                  |                      |                                                       |                                                 |                                                                 |                                       |                       |   |
| Smokers/ ex smokers                               | p       | 0.2610  | 0.1811  | 0.0283  | 1                         |                 |                |                 |                                    |                |                |                                              |                                                                |                  |                      |                                                       |                                                 |                                                                 |                                       |                       |   |
|                                                   | p-value | 0.0032  | 0.0425  | 0.7535  |                           |                 |                |                 |                                    |                |                |                                              |                                                                |                  |                      |                                                       |                                                 |                                                                 |                                       |                       |   |
| Reiff_score                                       | p       | 0.1300  | 0.1153  | -0.1150 | -0.0570                   | 1               |                |                 |                                    |                |                |                                              |                                                                |                  |                      |                                                       |                                                 |                                                                 |                                       |                       |   |
|                                                   | p-value | 0.1469  | 0.1985  | 0.1996  | 0.5260                    |                 |                |                 |                                    |                |                |                                              |                                                                |                  |                      |                                                       |                                                 |                                                                 |                                       |                       |   |
| Daily cough                                       | p       | 0.1388  | -0.0166 | 0.1119  | 0.0926                    | -0.0054         | 1              |                 |                                    |                |                |                                              |                                                                |                  |                      |                                                       |                                                 |                                                                 |                                       |                       |   |
|                                                   | p-value | 0.1212  | 0.8539  | 0.2124  | 0.3022                    | 0.9522          |                |                 |                                    |                |                |                                              |                                                                |                  |                      |                                                       |                                                 |                                                                 |                                       |                       |   |
| Daily sputum                                      | p       | -0.0976 | 0.0046  | 0.1370  | -0.0743                   | 0.0083          | 0.0187         | 1               |                                    |                |                |                                              |                                                                |                  |                      |                                                       |                                                 |                                                                 |                                       |                       |   |
|                                                   | p-value | 0.2769  | 0.9595  | 0.1261  | 0.4086                    | 0.9266          | 0.8355         |                 |                                    |                |                |                                              |                                                                |                  |                      |                                                       |                                                 |                                                                 |                                       |                       |   |
| Prior history of haemoptysis                      | p       | -0.1637 | -0.0907 | 0.0511  | 0.0959                    | 0.0098          | -0.1224        | 0.0316          | 1                                  |                |                |                                              |                                                                |                  |                      |                                                       |                                                 |                                                                 |                                       |                       |   |
|                                                   | p-value | 0.0669  | 0.3127  | 0.5697  | 0.2856                    | 0.9136          | 0.1723         | 0.7251          |                                    |                |                |                                              |                                                                |                  |                      |                                                       |                                                 |                                                                 |                                       |                       |   |
| MRC                                               | p       | 0.2156  | 0.1521  | 0.0207  | 0.2148                    | <b>0.4265</b>   | 0.1012         | 0.0613          | -0.0705                            | 1              |                |                                              |                                                                |                  |                      |                                                       |                                                 |                                                                 |                                       |                       |   |
|                                                   | p-value | 0.0153  | 0.0890  | 0.8178  | 0.0157                    | <b>0.0000</b>   | 0.2596         | 0.4953          | 0.4327                             |                |                |                                              |                                                                |                  |                      |                                                       |                                                 |                                                                 |                                       |                       |   |
| LTOT                                              | p       | 0.0665  | 0.1301  | -0.0319 | <b>0.3119</b>             | 0.1637          | -0.0227        | -0.0136         | 0.0422                             | <b>0.6190</b>  | 1              |                                              |                                                                |                  |                      |                                                       |                                                 |                                                                 |                                       |                       |   |
|                                                   | p-value | 0.4593  | 0.1464  | 0.7228  | <b>0.0004</b>             | 0.0670          | 0.8011         | 0.8796          | 0.6388                             | <b>0.0000</b>  |                |                                              |                                                                |                  |                      |                                                       |                                                 |                                                                 |                                       |                       |   |
| Exacerbations in the previous year                | p       | -0.1739 | -0.0013 | 0.1701  | 0.0212                    | 0.0109          | -0.0114        | 0.2152          | 0.0074                             | 0.1664         | 0.1856         | 1                                            |                                                                |                  |                      |                                                       |                                                 |                                                                 |                                       |                       |   |
|                                                   | p-value | 0.0514  | 0.9881  | 0.0568  | 0.8138                    | 0.9033          | 0.8991         | 0.0155          | 0.9347                             | 0.0626         | 0.0375         |                                              |                                                                |                  |                      |                                                       |                                                 |                                                                 |                                       |                       |   |
| At least one hospitalization in the previous year | p       | -0.1637 | -0.0344 | 0.0016  | -0.1081                   | 0.0976          | -0.0742        | 0.1576          | 0.0553                             | 0.2302         | 0.1389         | <b>0.3910</b>                                | 1                                                              |                  |                      |                                                       |                                                 |                                                                 |                                       |                       |   |
|                                                   | p-value | 0.0670  | 0.7018  | 0.9861  | 0.2282                    | 0.2771          | 0.4091         | 0.0780          | 0.5387                             | 0.0095         | 0.1210         | <b>0.0000</b>                                |                                                                |                  |                      |                                                       |                                                 |                                                                 |                                       |                       |   |
| FEV <sub>1</sub>                                  | p       | -0.0002 | -0.2581 | -0.0690 | -0.1916                   | <b>-0.4543</b>  | 0.0300         | -0.0190         | -0.2440                            | <b>-0.4698</b> | <b>-0.3394</b> | -0.1267                                      | -0.0768                                                        | 1                |                      |                                                       |                                                 |                                                                 |                                       |                       |   |
|                                                   | p-value | 0.9983  | 0.0035  | 0.4427  | 0.0317                    | <b>0.0000</b>   | 0.7389         | 0.8326          | 0.0059                             | <b>0.0000</b>  | <b>0.0001</b>  | 0.1574                                       | 0.3928                                                         |                  |                      |                                                       |                                                 |                                                                 |                                       |                       |   |
| Chronic infection                                 | p       | .       | .       | .       | .                         | .               | .              | .               | .                                  | .              | .              | .                                            | .                                                              | .                | .                    | .                                                     | .                                               | .                                                               | .                                     | .                     |   |
|                                                   | p-value | .       | .       | .       | .                         | .               | .              | .               | .                                  | .              | .              | .                                            | .                                                              | .                | .                    | .                                                     | .                                               | .                                                               | .                                     | .                     |   |
| Chronic infection with <i>P. aeruginosa</i>       | p       | .       | .       | .       | .                         | .               | .              | .               | .                                  | .              | .              | .                                            | .                                                              | .                | .                    | .                                                     | .                                               | .                                                               | .                                     | .                     |   |
|                                                   | p-value | .       | .       | .       | .                         | .               | .              | .               | .                                  | .              | .              | .                                            | .                                                              | .                | .                    | .                                                     | .                                               | .                                                               | .                                     | .                     |   |
| Chronic infection with other pathogens            | p       | .       | .       | .       | .                         | .               | .              | .               | .                                  | .              | .              | .                                            | .                                                              | .                | .                    | .                                                     | .                                               | .                                                               | .                                     | .                     |   |
|                                                   | p-value | .       | .       | .       | .                         | .               | .              | .               | .                                  | .              | .              | .                                            | .                                                              | .                | .                    | .                                                     | .                                               | .                                                               | .                                     | .                     |   |
| More_than one pathogen causing chronic infection  | p       | -0.0916 | 0.1636  | 0.2136  | 0.0786                    | -0.1185         | -0.0097        | 0.1439          | 0.0181                             | -0.0186        | -0.1874        | 0.1666                                       | 0.1869                                                         | -0.0271          | .                    | .                                                     | .                                               | .                                                               | 1                                     | .                     |   |
|                                                   | p-value | 0.3078  | 0.0672  | 0.0163  | 0.3819                    | 0.1864          | 0.9141         | 0.1079          | 0.8408                             | 0.8359         | 0.0356         | 0.0623                                       | 0.0362                                                         | 0.7632           | .                    | .                                                     | .                                               | .                                                               |                                       |                       |   |
| Charlson Comorbidity Index>1                      | p       | 0.1561  | 0.1967  | -0.1024 | 0.2488                    | 0.0724          | 0.0501         | -0.0310         | -0.0934                            | 0.1446         | 0.0728         | -0.0784                                      | -0.0439                                                        | -0.0196          | .                    | .                                                     | .                                               | .                                                               | 0.0574                                | 1                     |   |
|                                                   | p-value | 0.0809  | 0.0272  | 0.2539  | 0.0050                    | 0.4208          | 0.5773         | 0.7303          | 0.2984                             | 0.1063         | 0.4176         | 0.3827                                       | 0.6257                                                         | 0.8279           | .                    | .                                                     | .                                               | .                                                               | 0.5233                                |                       |   |
| C-reactive protein                                | p       | -0.0437 | 0.0011  | -0.1064 | 0.0582                    | 0.1647          | 0.1481         | -0.0391         | 0.0103                             | <b>0.3710</b>  | <b>0.4532</b>  | 0.1349                                       | 0.0031                                                         | -0.2245          | .                    | .                                                     | .                                               | .                                                               | -0.0579                               | 0.0520                | 1 |

|                                                   | p-value  | 0.6272  | 0.9903  | 0.2356  | 0.5173                    | 0.0653          | 0.0978         | 0.6637          | 0.9090                             | <b>0.0000</b>  | <b>0.0000</b> | 0.1320                                          | 0.9722                                                         | 0.0115           | .                    | .                                                     | .                                               | 0.5199                                                          | 0.5629                                |                       |
|---------------------------------------------------|----------|---------|---------|---------|---------------------------|-----------------|----------------|-----------------|------------------------------------|----------------|---------------|-------------------------------------------------|----------------------------------------------------------------|------------------|----------------------|-------------------------------------------------------|-------------------------------------------------|-----------------------------------------------------------------|---------------------------------------|-----------------------|
| Cluster 2 "Other chronic infection"               |          |         |         |         |                           |                 |                |                 |                                    |                |               |                                                 |                                                                |                  |                      |                                                       |                                                 |                                                                 |                                       |                       |
|                                                   |          | Age     | Sex     | BMI     | Smokers/<br>ex<br>smokers | Reiff_<br>score | Daily<br>cough | Daily<br>sputum | Prior history<br>of<br>haemoptysis | MRC            | LTOT          | Exacerbat<br>ions in<br>the<br>previous<br>year | At least one<br>hospitalizat<br>ion in the<br>previous<br>year | FEV <sub>i</sub> | Chronic<br>infection | Chronic<br>infection<br>with <i>P.<br/>aeruginosa</i> | Chronic<br>infection<br>with other<br>pathogens | More_than<br>one<br>pathogen<br>causing<br>chronic<br>infection | Charlson<br>Comorbidi<br>ties Index>1 | C-reactive<br>protein |
| Age                                               | <b>p</b> | 1       |         |         |                           |                 |                |                 |                                    |                |               |                                                 |                                                                |                  |                      |                                                       |                                                 |                                                                 |                                       |                       |
|                                                   | p-value  |         |         |         |                           |                 |                |                 |                                    |                |               |                                                 |                                                                |                  |                      |                                                       |                                                 |                                                                 |                                       |                       |
| Sex                                               | <b>p</b> | 0.1493  | 1       |         |                           |                 |                |                 |                                    |                |               |                                                 |                                                                |                  |                      |                                                       |                                                 |                                                                 |                                       |                       |
|                                                   | p-value  | 0.0238  |         |         |                           |                 |                |                 |                                    |                |               |                                                 |                                                                |                  |                      |                                                       |                                                 |                                                                 |                                       |                       |
| BMI                                               | <b>p</b> | -0.0269 | 0.1549  | 1       |                           |                 |                |                 |                                    |                |               |                                                 |                                                                |                  |                      |                                                       |                                                 |                                                                 |                                       |                       |
|                                                   | p-value  | 0.6855  | 0.0190  |         |                           |                 |                |                 |                                    |                |               |                                                 |                                                                |                  |                      |                                                       |                                                 |                                                                 |                                       |                       |
| Smokers/<br>ex smokers                            | <b>p</b> | 0.0556  | 0.1765  | -0.0028 | 1                         |                 |                |                 |                                    |                |               |                                                 |                                                                |                  |                      |                                                       |                                                 |                                                                 |                                       |                       |
|                                                   | p-value  | 0.4023  | 0.0074  | 0.9664  |                           |                 |                |                 |                                    |                |               |                                                 |                                                                |                  |                      |                                                       |                                                 |                                                                 |                                       |                       |
| Reiff_ score                                      | <b>p</b> | 0.1437  | 0.1053  | -0.2456 | 0.0555                    | 1               |                |                 |                                    |                |               |                                                 |                                                                |                  |                      |                                                       |                                                 |                                                                 |                                       |                       |
|                                                   | p-value  | 0.0297  | 0.1121  | 0.0002  | 0.4031                    |                 |                |                 |                                    |                |               |                                                 |                                                                |                  |                      |                                                       |                                                 |                                                                 |                                       |                       |
| Daily cough                                       | <b>p</b> | 0.1545  | 0.0075  | 0.0028  | -0.0176                   | 0.0930          | 1              |                 |                                    |                |               |                                                 |                                                                |                  |                      |                                                       |                                                 |                                                                 |                                       |                       |
|                                                   | p-value  | 0.0193  | 0.9106  | 0.9669  | 0.7911                    | 0.1608          |                |                 |                                    |                |               |                                                 |                                                                |                  |                      |                                                       |                                                 |                                                                 |                                       |                       |
| Daily sputum                                      | <b>p</b> | 0.2181  | 0.0653  | 0.0738  | -0.0457                   | 0.0359          | 0.2740         | 1               |                                    |                |               |                                                 |                                                                |                  |                      |                                                       |                                                 |                                                                 |                                       |                       |
|                                                   | p-value  | 0.0009  | 0.3250  | 0.2661  | 0.4915                    | 0.5885          | 0.0000         |                 |                                    |                |               |                                                 |                                                                |                  |                      |                                                       |                                                 |                                                                 |                                       |                       |
| Prior history of haemoptysis                      | <b>p</b> | 0.1619  | 0.0495  | 0.0049  | -0.0713                   | 0.1096          | -0.1020        | 0.0782          | 1                                  |                |               |                                                 |                                                                |                  |                      |                                                       |                                                 |                                                                 |                                       |                       |
|                                                   | p-value  | 0.0142  | 0.4563  | 0.9415  | 0.2825                    | 0.0981          | 0.1239         | 0.2388          |                                    |                |               |                                                 |                                                                |                  |                      |                                                       |                                                 |                                                                 |                                       |                       |
| MRC                                               | <b>p</b> | 0.2236  | 0.0871  | 0.0225  | 0.0457                    | 0.1769          | 0.1670         | 0.1310          | 0.0384                             | 1              |               |                                                 |                                                                |                  |                      |                                                       |                                                 |                                                                 |                                       |                       |
|                                                   | p-value  | 0.0007  | 0.1892  | 0.7353  | 0.4914                    | 0.0073          | 0.0114         | 0.0477          | 0.5633                             |                |               |                                                 |                                                                |                  |                      |                                                       |                                                 |                                                                 |                                       |                       |
| LTOT                                              | <b>p</b> | 0.0895  | 0.1447  | -0.0941 | 0.0563                    | 0.1515          | 0.0786         | -0.0077         | 0.0523                             | 0.3622         | 1             |                                                 |                                                                |                  |                      |                                                       |                                                 |                                                                 |                                       |                       |
|                                                   | p-value  | 0.1772  | 0.0286  | 0.1560  | 0.3969                    | 0.0218          | 0.2359         | 0.9072          | 0.4306                             | 0.0000         |               |                                                 |                                                                |                  |                      |                                                       |                                                 |                                                                 |                                       |                       |
| Exacerbations in the previous year                | <b>p</b> | -0.0433 | 0.0215  | 0.0616  | 0.0938                    | -0.1154         | -0.0107        | 0.0375          | 0.0555                             | 0.0913         | 0.1432        | 1                                               |                                                                |                  |                      |                                                       |                                                 |                                                                 |                                       |                       |
|                                                   | p-value  | 0.5146  | 0.7461  | 0.3536  | 0.1573                    | 0.0815          | 0.8726         | 0.5728          | 0.4035                             | 0.1685         | 0.0303        |                                                 |                                                                |                  |                      |                                                       |                                                 |                                                                 |                                       |                       |
| At least one hospitalization in the previous year | <b>p</b> | 0.1185  | 0.1356  | -0.0714 | 0.1507                    | 0.1870          | 0.0707         | 0.1458          | 0.2089                             | <b>0.3397</b>  | 0.0913        | <b>0.3234</b>                                   | 1                                                              |                  |                      |                                                       |                                                 |                                                                 |                                       |                       |
|                                                   | p-value  | 0.0734  | 0.0404  | 0.2820  | 0.0225                    | 0.0045          | 0.2870         | 0.0273          | 0.0015                             | <b>0.0000</b>  | 0.1687        | <b>0.0000</b>                                   |                                                                |                  |                      |                                                       |                                                 |                                                                 |                                       |                       |
| FEV <sub>i</sub>                                  | <b>p</b> | -0.1457 | -0.1132 | 0.0288  | 0.0030                    | -0.1810         | -0.0421        | -0.0280         | -0.0397                            | <b>-0.5561</b> | -0.2704       | -0.0683                                         | -0.2355                                                        | 1                |                      |                                                       |                                                 |                                                                 |                                       |                       |
|                                                   | p-value  | 0.0274  | 0.0875  | 0.6650  | 0.9639                    | 0.0060          | 0.5266         | 0.6731          | 0.5498                             | <b>0.0000</b>  | 0.0000        | 0.3035                                          | 0.0003                                                         |                  |                      |                                                       |                                                 |                                                                 |                                       |                       |
| Chronic infection                                 | <b>p</b> | .       | .       | .       | .                         | .               | .              | .               | .                                  | .              | .             | .                                               | .                                                              | .                | .                    | .                                                     | .                                               | .                                                               | .                                     | .                     |
|                                                   | p-value  | .       | .       | .       | .                         | .               | .              | .               | .                                  | .              | .             | .                                               | .                                                              | .                | .                    | .                                                     | .                                               | .                                                               | .                                     | .                     |
| Chronic infection with <i>P. aeruginosa</i>       | <b>p</b> | .       | .       | .       | .                         | .               | .              | .               | .                                  | .              | .             | .                                               | .                                                              | .                | .                    | .                                                     | .                                               | .                                                               | .                                     | .                     |
|                                                   | p-value  | .       | .       | .       | .                         | .               | .              | .               | .                                  | .              | .             | .                                               | .                                                              | .                | .                    | .                                                     | .                                               | .                                                               | .                                     | .                     |
| Chronic infection with other pathogens            | <b>p</b> | .       | .       | .       | .                         | .               | .              | .               | .                                  | .              | .             | .                                               | .                                                              | .                | .                    | .                                                     | .                                               | .                                                               | .                                     | .                     |
|                                                   | p-value  | .       | .       | .       | .                         | .               | .              | .               | .                                  | .              | .             | .                                               | .                                                              | .                | .                    | .                                                     | .                                               | .                                                               | .                                     | .                     |
| More_than one pathogen causing chronic infection  | <b>p</b> | -0.0214 | 0.0882  | 0.0204  | 0.0148                    | 0.0811          | -0.0046        | 0.2061          | 0.0632                             | 0.1383         | 0.0901        | 0.0777                                          | 0.1078                                                         | -0.1192          | .                    | .                                                     | .                                               | 1                                                               | .                                     | .                     |
|                                                   | p-value  | 0.7471  | 0.1835  | 0.7590  | 0.8240                    | 0.2215          | 0.9448         | 0.0017          | 0.3412                             | 0.0365         | 0.1743        | 0.2413                                          | 0.1037                                                         | 0.0718           | .                    | .                                                     | .                                               |                                                                 |                                       |                       |
| Charlson Comorbidity Index>1                      | <b>p</b> | 0.2168  | 0.2113  | 0.0396  | 0.1209                    | -0.0023         | 0.1126         | 0.1315          | 0.0305                             | 0.2785         | 0.0262        | 0.0376                                          | 0.1274                                                         | -0.1808          | .                    | .                                                     | .                                               | -0.0222                                                         | 1                                     | .                     |
|                                                   | p-value  | 0.0010  | 0.0013  | 0.5508  | 0.0678                    | 0.9722          | 0.0892         | 0.0468          | 0.6463                             | 0.0000         | 0.6928        | 0.5710                                          | 0.0542                                                         | 0.0061           | .                    | .                                                     | .                                               | 0.7386                                                          |                                       |                       |
| C-reactive protein                                | <b>p</b> | 0.0456  | 0.0222  | 0.0580  | -0.0468                   | 0.1169          | 0.0716         | 0.0921          | 0.0229                             | 0.2555         | 0.1006        | 0.0318                                          | 0.2172                                                         | -0.2963          | .                    | .                                                     | .                                               | 0.1568                                                          | 0.0691                                | 1                     |
|                                                   | p-value  | 0.4925  | 0.7381  | 0.3819  | 0.4808                    | 0.0774          | 0.2809         | 0.1647          | 0.7300                             | 0.0001         | 0.1289        | 0.6319                                          | 0.0009                                                         | 0.0000           | .                    | .                                                     | .                                               | 0.0176                                                          | 0.2979                                |                       |

| Cluster 3 "Daily sputum"                          |         |         |         |         |                           |                 |                |                 |                                    |         |         |                                              |                                                                |                  |                      |                                                       |                                                 |                                                                 |                                       |                       |
|---------------------------------------------------|---------|---------|---------|---------|---------------------------|-----------------|----------------|-----------------|------------------------------------|---------|---------|----------------------------------------------|----------------------------------------------------------------|------------------|----------------------|-------------------------------------------------------|-------------------------------------------------|-----------------------------------------------------------------|---------------------------------------|-----------------------|
|                                                   |         | Age     | Sex     | BMI     | Smokers/<br>ex<br>smokers | Reiff_<br>score | Daily<br>cough | Daily<br>sputum | Prior history<br>of<br>haemoptysis | MRC     | LTOT    | Exacerbatio<br>ns in the<br>previous<br>year | At least one<br>hospitalizati<br>on in the<br>previous<br>year | FEV <sub>1</sub> | Chronic<br>infection | Chronic<br>infection<br>with <i>P.<br/>aeruginosa</i> | Chronic<br>infection<br>with other<br>pathogens | More_than<br>one<br>pathogen<br>causing<br>chronic<br>infection | Charlson<br>Comorbiditi<br>es Index>1 | C-reactive<br>protein |
| Age                                               | P       | 1       |         |         |                           |                 |                |                 |                                    |         |         |                                              |                                                                |                  |                      |                                                       |                                                 |                                                                 |                                       |                       |
|                                                   | p-value |         |         |         |                           |                 |                |                 |                                    |         |         |                                              |                                                                |                  |                      |                                                       |                                                 |                                                                 |                                       |                       |
| Sex                                               | P       | 0.0029  | 1       |         |                           |                 |                |                 |                                    |         |         |                                              |                                                                |                  |                      |                                                       |                                                 |                                                                 |                                       |                       |
|                                                   | p-value | 0.9621  |         |         |                           |                 |                |                 |                                    |         |         |                                              |                                                                |                  |                      |                                                       |                                                 |                                                                 |                                       |                       |
| BMI                                               | P       | -0.0021 | 0.0431  | 1       |                           |                 |                |                 |                                    |         |         |                                              |                                                                |                  |                      |                                                       |                                                 |                                                                 |                                       |                       |
|                                                   | p-value | 0.9717  | 0.4776  |         |                           |                 |                |                 |                                    |         |         |                                              |                                                                |                  |                      |                                                       |                                                 |                                                                 |                                       |                       |
| Smokers/ ex smokers                               | P       | 0.0552  | 0.1984  | 0.0357  | 1                         |                 |                |                 |                                    |         |         |                                              |                                                                |                  |                      |                                                       |                                                 |                                                                 |                                       |                       |
|                                                   | p-value | 0.3628  | 0.0010  | 0.5566  |                           |                 |                |                 |                                    |         |         |                                              |                                                                |                  |                      |                                                       |                                                 |                                                                 |                                       |                       |
| Reiff_ score                                      | P       | 0.0832  | 0.0213  | -0.1482 | 0.0229                    | 1               |                |                 |                                    |         |         |                                              |                                                                |                  |                      |                                                       |                                                 |                                                                 |                                       |                       |
|                                                   | p-value | 0.1699  | 0.7262  | 0.0141  | 0.7059                    |                 |                |                 |                                    |         |         |                                              |                                                                |                  |                      |                                                       |                                                 |                                                                 |                                       |                       |
| Daily cough                                       | P       | -0.0957 | 0.0049  | -0.0064 | -0.0980                   | -0.0362         | 1              |                 |                                    |         |         |                                              |                                                                |                  |                      |                                                       |                                                 |                                                                 |                                       |                       |
|                                                   | p-value | 0.1139  | 0.9353  | 0.9159  | 0.1054                    | 0.5512          |                |                 |                                    |         |         |                                              |                                                                |                  |                      |                                                       |                                                 |                                                                 |                                       |                       |
| Daily sputum                                      | P       | -0.0478 | 0.0822  | 0.0874  | -0.0498                   | -0.0181         | 0.1989         | 1               |                                    |         |         |                                              |                                                                |                  |                      |                                                       |                                                 |                                                                 |                                       |                       |
|                                                   | p-value | 0.4303  | 0.1749  | 0.1489  | 0.4118                    | 0.7661          | 0.0009         |                 |                                    |         |         |                                              |                                                                |                  |                      |                                                       |                                                 |                                                                 |                                       |                       |
| Prior history of haemoptysis                      | P       | 0.0325  | -0.0102 | -0.0185 | 0.0194                    | 0.0782          | 0.0032         | 0.0765          | 1                                  |         |         |                                              |                                                                |                  |                      |                                                       |                                                 |                                                                 |                                       |                       |
|                                                   | p-value | 0.5921  | 0.8668  | 0.7603  | 0.7489                    | 0.1970          | 0.9585         | 0.2068          |                                    |         |         |                                              |                                                                |                  |                      |                                                       |                                                 |                                                                 |                                       |                       |
| MRC                                               | P       | 0.1402  | 0.0138  | 0.0041  | 0.1291                    | 0.2132          | -0.0030        | -0.2632         | -0.0155                            | 1       |         |                                              |                                                                |                  |                      |                                                       |                                                 |                                                                 |                                       |                       |
|                                                   | p-value | 0.0202  | 0.8197  | 0.9457  | 0.0327                    | 0.0004          | 0.9604         | 0.0000          | 0.7986                             |         |         |                                              |                                                                |                  |                      |                                                       |                                                 |                                                                 |                                       |                       |
| LTOT                                              | P       | 0.0139  | 0.0982  | -0.0375 | 0.2041                    | 0.2125          | -0.1889        | -0.5001         | -0.0885                            | 0.4970  | 1       |                                              |                                                                |                  |                      |                                                       |                                                 |                                                                 |                                       |                       |
|                                                   | p-value | 0.8183  | 0.1048  | 0.5368  | 0.0007                    | 0.0004          | 0.0017         | 0.0000          | 0.1440                             | 0.0000  |         |                                              |                                                                |                  |                      |                                                       |                                                 |                                                                 |                                       |                       |
| Exacerbations in the previous year                | P       | -0.0700 | -0.0726 | 0.1469  | 0.1655                    | 0.0710          | -0.0344        | 0.0466          | 0.0492                             | 0.2651  | 0.1309  | 1                                            |                                                                |                  |                      |                                                       |                                                 |                                                                 |                                       |                       |
|                                                   | p-value | 0.2479  | 0.2313  | 0.0149  | 0.0060                    | 0.2415          | 0.5708         | 0.4427          | 0.4171                             | 0.0000  | 0.0302  |                                              |                                                                |                  |                      |                                                       |                                                 |                                                                 |                                       |                       |
| At least one hospitalization in the previous year | P       | 0.0371  | 0.0103  | 0.0192  | 0.0861                    | 0.0870          | 0.0642         | -0.0261         | 0.0012                             | 0.3180  | 0.2200  | 0.4536                                       | 1                                                              |                  |                      |                                                       |                                                 |                                                                 |                                       |                       |
|                                                   | p-value | 0.5413  | 0.8652  | 0.7518  | 0.1550                    | 0.1509          | 0.2899         | 0.6668          | 0.9847                             | 0.0000  | 0.0002  | 0.0000                                       |                                                                |                  |                      |                                                       |                                                 |                                                                 |                                       |                       |
| FEV <sub>1</sub>                                  | P       | -0.1005 | -0.0981 | 0.0769  | -0.2089                   | -0.2590         | -0.0332        | 0.1436          | -0.0598                            | -0.5372 | -0.3220 | -0.2099                                      | -0.2481                                                        | 1                |                      |                                                       |                                                 |                                                                 |                                       |                       |
|                                                   | p-value | 0.0969  | 0.1050  | 0.2047  | 0.0005                    | 0.0000          | 0.5848         | 0.0174          | 0.3240                             | 0.0000  | 0.0000  | 0.0005                                       | 0.0000                                                         |                  |                      |                                                       |                                                 |                                                                 |                                       |                       |
| Chronic infection                                 | P       | .       | .       | .       | .                         | .               | .              | .               | .                                  | .       | .       | .                                            | .                                                              | .                | .                    | .                                                     | .                                               | .                                                               | .                                     | .                     |
|                                                   | p-value | .       | .       | .       | .                         | .               | .              | .               | .                                  | .       | .       | .                                            | .                                                              | .                | .                    | .                                                     | .                                               | .                                                               | .                                     | .                     |
| Chronic infection with <i>P. aeruginosa</i>       | P       | .       | .       | .       | .                         | .               | .              | .               | .                                  | .       | .       | .                                            | .                                                              | .                | .                    | .                                                     | .                                               | .                                                               | .                                     | .                     |
|                                                   | p-value | .       | .       | .       | .                         | .               | .              | .               | .                                  | .       | .       | .                                            | .                                                              | .                | .                    | .                                                     | .                                               | .                                                               | .                                     | .                     |
| Chronic infection with other pathogens            | P       | .       | .       | .       | .                         | .               | .              | .               | .                                  | .       | .       | .                                            | .                                                              | .                | .                    | .                                                     | .                                               | .                                                               | .                                     | .                     |
|                                                   | p-value | .       | .       | .       | .                         | .               | .              | .               | .                                  | .       | .       | .                                            | .                                                              | .                | .                    | .                                                     | .                                               | .                                                               | .                                     | .                     |
| More_than one pathogen causing chronic infection  | P       | .       | .       | .       | .                         | .               | .              | .               | .                                  | .       | .       | .                                            | .                                                              | .                | .                    | .                                                     | .                                               | .                                                               | .                                     | .                     |
|                                                   | p-value | .       | .       | .       | .                         | .               | .              | .               | .                                  | .       | .       | .                                            | .                                                              | .                | .                    | .                                                     | .                                               | .                                                               | .                                     | .                     |
| Charlson Comorbidities Index>                     | P       | 0.2340  | 0.0831  | 0.0775  | 0.1455                    | -0.0139         | -0.0198        | -0.0708         | 0.0184                             | 0.2224  | 0.1972  | 0.0716                                       | 0.1161                                                         | -0.1651          | .                    | .                                                     | .                                               | .                                                               | .                                     | 1                     |
|                                                   | p-value | 0.0001  | 0.1699  | 0.2011  | 0.0160                    | 0.8188          | 0.7447         | 0.2426          | 0.7620                             | 0.0002  | 0.0010  | 0.2373                                       | 0.0549                                                         | 0.0061           | .                    | .                                                     | .                                               | .                                                               | .                                     | .                     |
| C-reactive protein                                | P       | 0.0455  | -0.0926 | 0.0628  | -0.1636                   | 0.1252          | 0.1542         | 0.0234          | 0.0886                             | 0.0233  | -0.0137 | 0.0123                                       | 0.0801                                                         | -0.1479          | .                    | .                                                     | .                                               | .                                                               | .                                     | 0.1319                |
|                                                   | p-value | 0.4536  | 0.1264  | 0.3006  | 0.0066                    | 0.0383          | 0.0106         | 0.6996          | 0.1436                             | 0.7013  | 0.8213  | 0.8396                                       | 0.1861                                                         | 0.0143           | .                    | .                                                     | .                                               | .                                                               | .                                     | 0.0291                |

Cluster 4 "Dry bronchiectasis"

|                                                   |          | Age           | Sex     | BMI     | Smokers/<br>ex<br>smokers | Reiff_<br>score | Daily<br>cough | Daily<br>sputum | Prior history<br>of<br>haemoptysis | MRC            | LTOT | Exacerbatio<br>ns in the<br>previous<br>year | At least one<br>hospitalizati<br>on in the<br>previous<br>year | FEV <sub>1</sub> | Chronic<br>infection | Chronic<br>infection<br>with <i>P.<br/>aeruginosa</i> | Chronic<br>infection<br>with other<br>pathogens | More_than<br>one<br>pathogen<br>causing<br>chronic<br>infection | Charlson<br>Comorbidity<br>Index>1 | C-reactive<br>protein |
|---------------------------------------------------|----------|---------------|---------|---------|---------------------------|-----------------|----------------|-----------------|------------------------------------|----------------|------|----------------------------------------------|----------------------------------------------------------------|------------------|----------------------|-------------------------------------------------------|-------------------------------------------------|-----------------------------------------------------------------|------------------------------------|-----------------------|
| Age                                               | <b>p</b> | 1             |         |         |                           |                 |                |                 |                                    |                |      |                                              |                                                                |                  |                      |                                                       |                                                 |                                                                 |                                    |                       |
|                                                   | p-value  |               |         |         |                           |                 |                |                 |                                    |                |      |                                              |                                                                |                  |                      |                                                       |                                                 |                                                                 |                                    |                       |
| Sex                                               | <b>p</b> | 0.2000        | 1       |         |                           |                 |                |                 |                                    |                |      |                                              |                                                                |                  |                      |                                                       |                                                 |                                                                 |                                    |                       |
|                                                   | p-value  | 0.0015        |         |         |                           |                 |                |                 |                                    |                |      |                                              |                                                                |                  |                      |                                                       |                                                 |                                                                 |                                    |                       |
| BMI                                               | <b>p</b> | 0.0557        | 0.1460  | 1       |                           |                 |                |                 |                                    |                |      |                                              |                                                                |                  |                      |                                                       |                                                 |                                                                 |                                    |                       |
|                                                   | p-value  | 0.3801        | 0.0209  |         |                           |                 |                |                 |                                    |                |      |                                              |                                                                |                  |                      |                                                       |                                                 |                                                                 |                                    |                       |
| Smokers/<br>ex smokers                            | <b>p</b> | 0.2541        | 0.2837  | -0.0541 | 1                         |                 |                |                 |                                    |                |      |                                              |                                                                |                  |                      |                                                       |                                                 |                                                                 |                                    |                       |
|                                                   | p-value  | 0.0000        | 0.0000  | 0.3946  |                           |                 |                |                 |                                    |                |      |                                              |                                                                |                  |                      |                                                       |                                                 |                                                                 |                                    |                       |
| Reiff_ score                                      | <b>p</b> | <b>0.3175</b> | 0.0576  | -0.1764 | 0.0300                    | 1               |                |                 |                                    |                |      |                                              |                                                                |                  |                      |                                                       |                                                 |                                                                 |                                    |                       |
|                                                   | p-value  | <b>0.0000</b> | 0.3641  | 0.0052  | 0.6366                    |                 |                |                 |                                    |                |      |                                              |                                                                |                  |                      |                                                       |                                                 |                                                                 |                                    |                       |
| Daily cough                                       | <b>p</b> | -0.0488       | 0.0503  | -0.0264 | -0.0629                   | -0.0666         | 1              |                 |                                    |                |      |                                              |                                                                |                  |                      |                                                       |                                                 |                                                                 |                                    |                       |
|                                                   | p-value  | 0.4428        | 0.4281  | 0.6776  | 0.3222                    | 0.2942          |                |                 |                                    |                |      |                                              |                                                                |                  |                      |                                                       |                                                 |                                                                 |                                    |                       |
| Daily sputum                                      | <b>p</b> | .             | .       | .       | .                         | .               | .              | .               | .                                  | .              | .    | .                                            | .                                                              | .                | .                    | .                                                     | .                                               | .                                                               | .                                  | .                     |
|                                                   | p-value  | .             | .       | .       | .                         | .               | .              | .               | .                                  | .              | .    | .                                            | .                                                              | .                | .                    | .                                                     | .                                               | .                                                               | .                                  | .                     |
| Prior history of haemoptysis                      | <b>p</b> | 0.0620        | -0.0070 | -0.1108 | -0.0162                   | 0.0556          | -0.0454        | .               | 1                                  |                |      |                                              |                                                                |                  |                      |                                                       |                                                 |                                                                 |                                    |                       |
|                                                   | p-value  | 0.3287        | 0.9122  | 0.0802  | 0.7987                    | 0.3813          | 0.4753         | .               |                                    |                |      |                                              |                                                                |                  |                      |                                                       |                                                 |                                                                 |                                    |                       |
| MRC                                               | <b>p</b> | 0.1750        | 0.1213  | 0.0126  | 0.1174                    | 0.2216          | 0.0485         | .               | 0.1007                             | 1              |      |                                              |                                                                |                  |                      |                                                       |                                                 |                                                                 |                                    |                       |
|                                                   | p-value  | 0.0055        | 0.0554  | 0.8428  | 0.0638                    | 0.0004          | 0.4457         | .               | 0.1123                             |                |      |                                              |                                                                |                  |                      |                                                       |                                                 |                                                                 |                                    |                       |
| LTOT                                              | <b>p</b> | .             | .       | .       | .                         | .               | .              | .               | .                                  | .              | .    | .                                            | .                                                              | .                | .                    | .                                                     | .                                               | .                                                               | .                                  | .                     |
|                                                   | p-value  | .             | .       | .       | .                         | .               | .              | .               | .                                  | .              | .    | .                                            | .                                                              | .                | .                    | .                                                     | .                                               | .                                                               | .                                  | .                     |
| Exacerbations in the previous year                | <b>p</b> | -0.2068       | -0.1623 | 0.1336  | -0.0850                   | -0.1229         | 0.0479         | .               | -0.0977                            | 0.0472         | .    | 1                                            |                                                                |                  |                      |                                                       |                                                 |                                                                 |                                    |                       |
|                                                   | p-value  | 0.0010        | 0.0102  | 0.0347  | 0.1803                    | 0.0523          | 0.4511         | .               | 0.1233                             | 0.4572         | .    |                                              |                                                                |                  |                      |                                                       |                                                 |                                                                 |                                    |                       |
| At least one hospitalization in the previous year | <b>p</b> | 0.0651        | 0.0008  | -0.0515 | 0.0665                    | 0.0458          | 0.0817         | .               | -0.0379                            | 0.1257         | .    | <b>0.3691</b>                                | 1                                                              |                  |                      |                                                       |                                                 |                                                                 |                                    |                       |
|                                                   | p-value  | 0.3056        | 0.9894  | 0.4176  | 0.2951                    | 0.4709          | 0.1979         | .               | 0.5509                             | 0.0472         | .    | <b>0.0000</b>                                |                                                                |                  |                      |                                                       |                                                 |                                                                 |                                    |                       |
| FEV <sub>1</sub>                                  | <b>p</b> | -0.2266       | -0.2611 | 0.0003  | -0.1578                   | -0.2214         | -0.0796        | .               | 0.0275                             | <b>-0.3478</b> | .    | -0.0117                                      | -0.0905                                                        | 1                |                      |                                                       |                                                 |                                                                 |                                    |                       |
|                                                   | p-value  | 0.0003        | 0.0000  | 0.9963  | 0.0125                    | 0.0004          | 0.2096         | .               | 0.6651                             | <b>0.0000</b>  | .    | 0.8537                                       | 0.1536                                                         |                  |                      |                                                       |                                                 |                                                                 |                                    |                       |
| Chronic infection                                 | <b>p</b> | .             | .       | .       | .                         | .               | .              | .               | .                                  | .              | .    | .                                            | .                                                              | .                | .                    | .                                                     | .                                               | .                                                               | .                                  | .                     |
|                                                   | p-value  | .             | .       | .       | .                         | .               | .              | .               | .                                  | .              | .    | .                                            | .                                                              | .                | .                    | .                                                     | .                                               | .                                                               | .                                  | .                     |
| Chronic infection with <i>P. aeruginosa</i>       | <b>p</b> | .             | .       | .       | .                         | .               | .              | .               | .                                  | .              | .    | .                                            | .                                                              | .                | .                    | .                                                     | .                                               | .                                                               | .                                  | .                     |
|                                                   | p-value  | .             | .       | .       | .                         | .               | .              | .               | .                                  | .              | .    | .                                            | .                                                              | .                | .                    | .                                                     | .                                               | .                                                               | .                                  | .                     |
| Chronic infection with other pathogens            | <b>p</b> | .             | .       | .       | .                         | .               | .              | .               | .                                  | .              | .    | .                                            | .                                                              | .                | .                    | .                                                     | .                                               | .                                                               | .                                  | .                     |
|                                                   | p-value  | .             | .       | .       | .                         | .               | .              | .               | .                                  | .              | .    | .                                            | .                                                              | .                | .                    | .                                                     | .                                               | .                                                               | .                                  | .                     |
| More_than one pathogen causing chronic infection  | <b>p</b> | .             | .       | .       | .                         | .               | .              | .               | .                                  | .              | .    | .                                            | .                                                              | .                | .                    | .                                                     | .                                               | .                                                               | .                                  | .                     |
|                                                   | p-value  | .             | .       | .       | .                         | .               | .              | .               | .                                  | .              | .    | .                                            | .                                                              | .                | .                    | .                                                     | .                                               | .                                                               | .                                  | .                     |
| Charlson Comorbidities Index>1                    | <b>p</b> | <b>0.3642</b> | 0.1759  | -0.0141 | 0.2137                    | 0.1327          | -0.0157        | .               | 0.0812                             | 0.2709         | .    | -0.1014                                      | 0.0867                                                         | -0.0914          | .                    | .                                                     | .                                               | .                                                               | 1                                  |                       |
|                                                   | p-value  | <b>0.0000</b> | 0.0053  | 0.8247  | 0.0007                    | 0.0359          | 0.8044         | .               | 0.2007                             | 0.0000         | .    | 0.1099                                       | 0.1718                                                         | 0.1495           | .                    | .                                                     | .                                               | .                                                               |                                    |                       |
| C-reactive protein                                | <b>p</b> | 0.1515        | 0.1949  | 0.0709  | 0.2202                    | 0.1435          | 0.0920         | .               | 0.0579                             | 0.1282         | .    | 0.0273                                       | 0.0746                                                         | -0.1763          | .                    | .                                                     | .                                               | .                                                               | 0.1009                             | 1                     |
|                                                   | p-value  | 0.0165        | 0.0020  | 0.2641  | 0.0005                    | 0.0233          | 0.1471         | .               | 0.3623                             | 0.0429         | .    | 0.6679                                       | 0.2402                                                         | 0.0052           | .                    | .                                                     | .                                               | .                                                               | 0.1114                             |                       |

## ONLINE FIGURE LEGEND

Figure S1. Dendrogram describing the cluster tree.

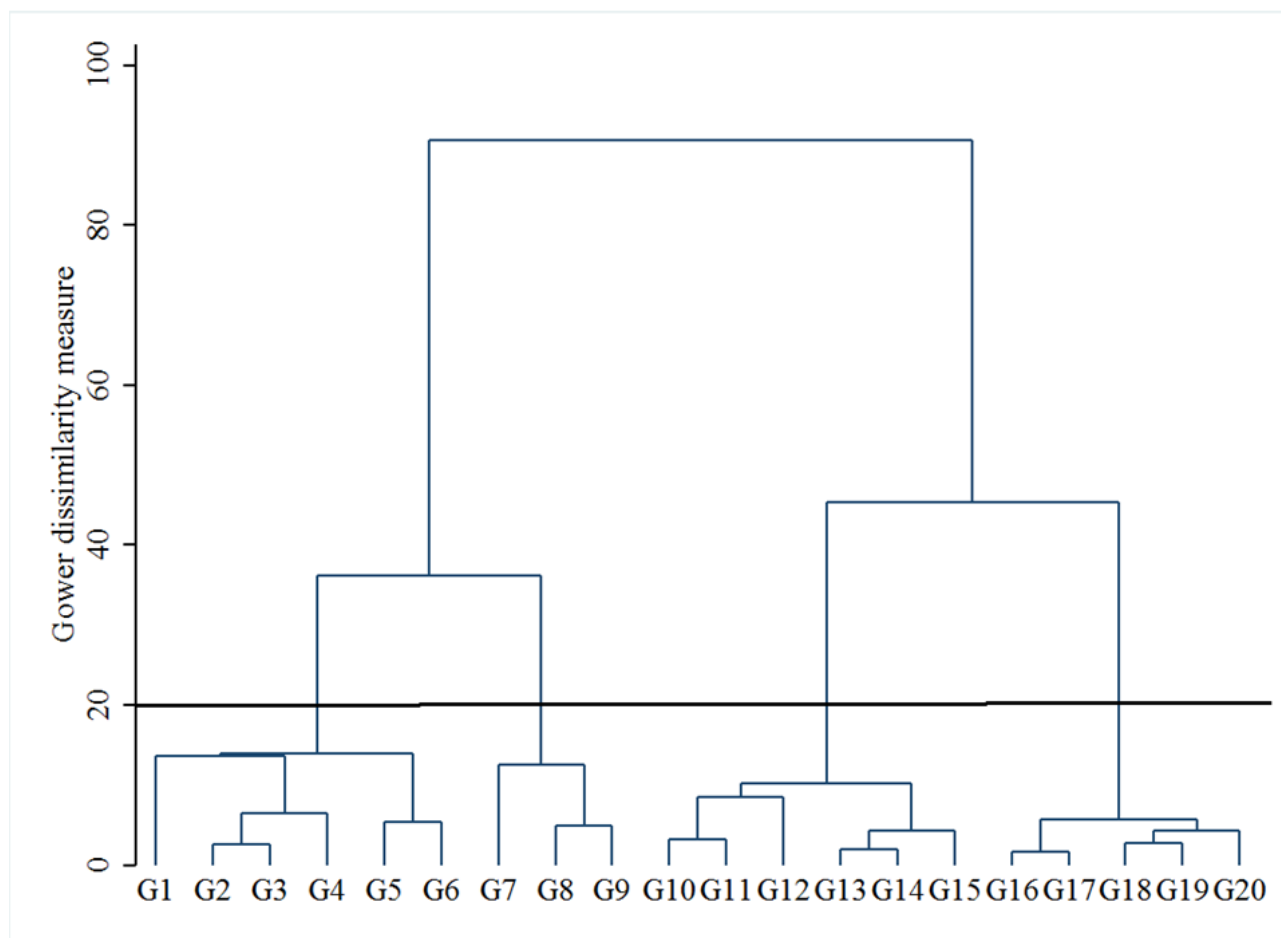

Supplement: ERJ-01899-2015_Online_supplement.pdf [file ERJ-01899-2015_Online_supplement.pdf]
